# Supplementary material
Source: Springer Nature journal article supplement (https://www.springermedizin.de/resource/supplementary/12890_2013_477_MOESM4_ESM.pdf/9505552)
Supplement: MOESM4 [file 9505552]

Screened (symptoms suggestive of  
respiratory tract infection)  
n=200

Ineligible/unsuitable  
/physician declined  
n=158

Eligible n=42

Patient/NOK/carer  
declined n=18

Non-recruited  
(missed at repeat  
review) n=10

Recruited n=14

ESDS n=8

SHC n=6
